# Supplementary material for: Genome-wide methylation patterns provide insight into differences in breast tumor biology between American women of African and European ancestry
Source: PubMed Central journal article supplement (PMC3960204; doi:10.18632/oncotarget.1599), 2013-11-29
Supplement: oncotarget-05-0237-s001.pdf [file oncotarget-05-0237-s001.pdf]

# Genome-wide methylation patterns provide insight into differences in breast tumor biology between American women of African and European ancestry - Ambrosone et al

## Tumor versus Normal

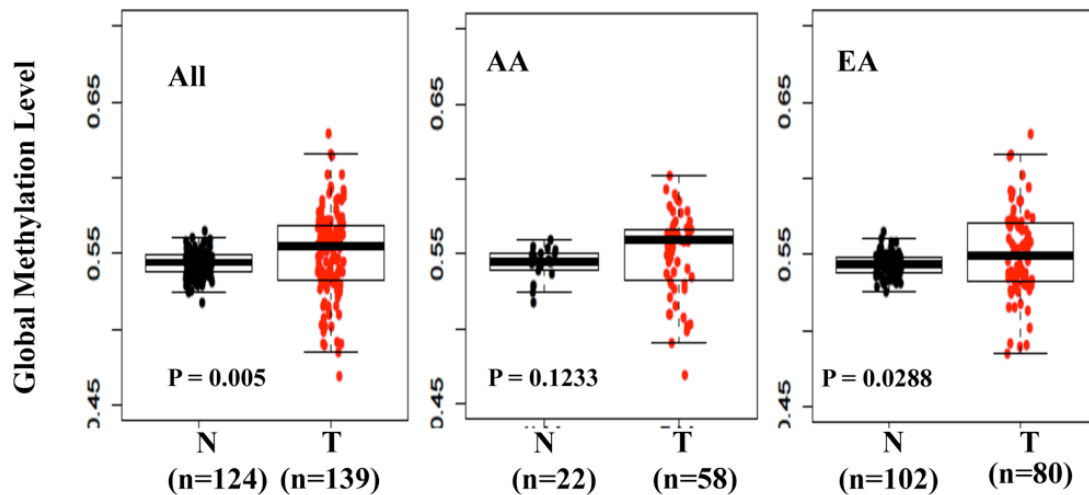

**Figure S1: Genome-wide differences in methylation levels between tumors and reduction mammoplasty samples.** On average, methylation levels at all CpG loci were consistently higher in tumors compared to normal controls (Welch’s t-test). This was the case when stratified by ancestry, but the difference between normal and tumor was only statistically significant in EA women.

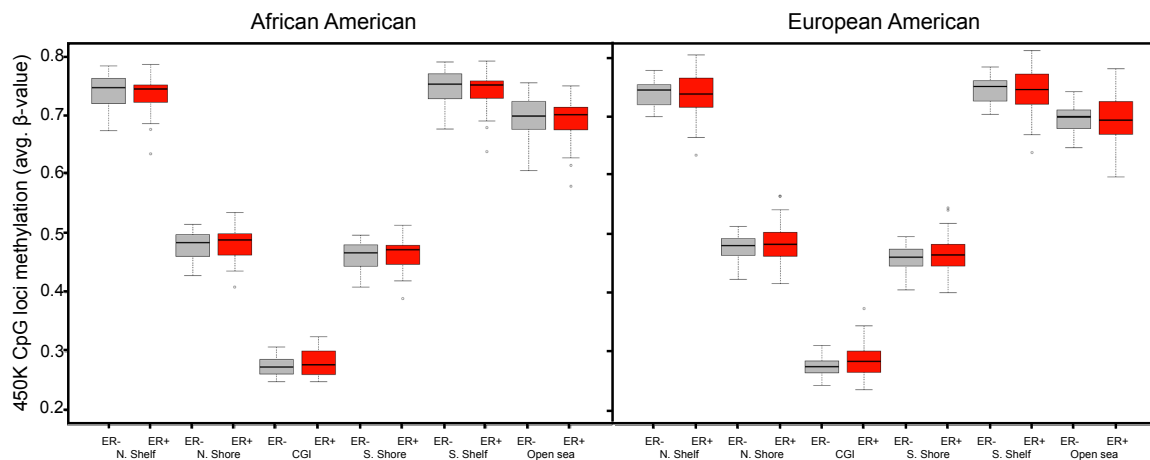

**Figure S2: Genome-wide differences in methylation levels between ER + and ER- tumors stratified by ancestry and location of CpG loci with respect to CGIs.** Although average methylation levels at loci within CGIs and CGI-shores were higher in ER+ tumors compared to ER-tumors regardless of ancestry, differences were not statistically significant (Welch’s t-test). N.Shelf, “North Shelf”; N. Shore, “North Shore”; S. Shore, “South Shore”; S. Shelf, “South Shelf”.

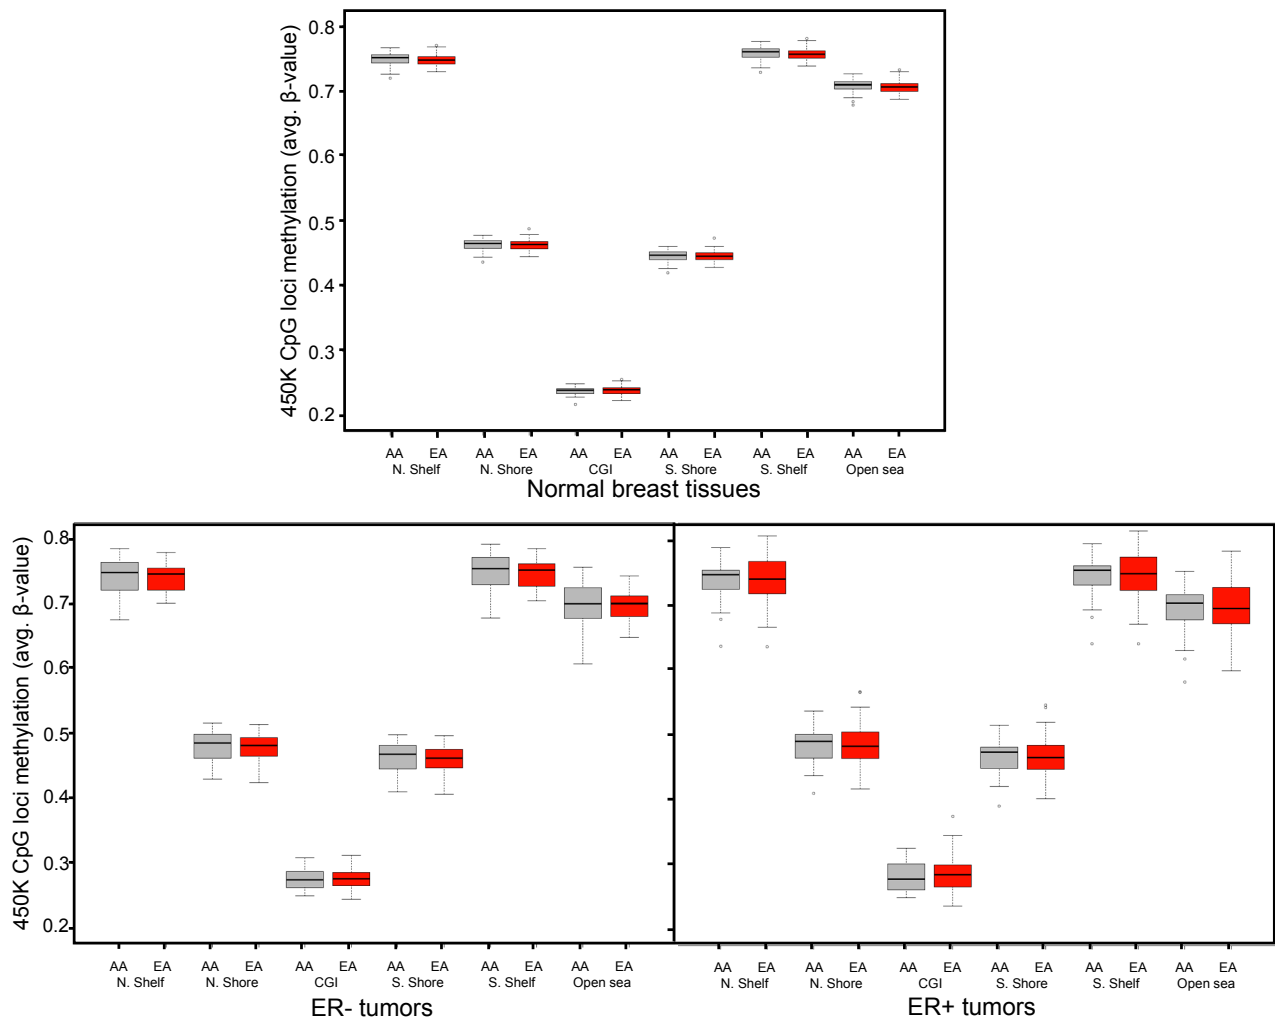

**Figure S3: Genome-wide differences in methylation levels between EA and AA women and location of CpG loci with respect to CGIs in normal tissue, and within tumors stratified by ER receptor status.**
